# Supplementary material for: Molecular Characterization of Polar Organic Matters in Off-road Engine Emissions Using Fourier Transform Ion Cyclotron Resonance Mass Spectrometry (FT-ICR MS): New Direction to Find Biomarkers
Source: Copernicus journal article supplement (doi:10.5194/acp-2019-449), 2019-05-23
Supplement: Supplementary file [file acp-2019-449-AC1-supplement.zip]

**Molecular Characterization of Polar Organic Aerosol Constituents in  
Off-Road Engine Emissions Using Fourier Transform Ion Cyclotron  
Resonance Mass Spectrometry (FT-ICR MS): Implications for  
Source Apportionment**  
**Molecular Characterization of Polar Organic  
Matters in Off-road Engine Emissions Using Fourier Transform Ion  
Cyclotron Resonance Mass Spectrometry (FT-ICR MS): New  
Direction to Find Biomarkers**

Min Cui<sup>1,2</sup>; Cheng Li<sup>3</sup>; Yingjun Chen<sup>4,1\*</sup>; Fan Zhang<sup>1</sup>; Jun Li<sup>2\*</sup>; Bin Jiang<sup>2</sup>; Yangzhi Mo<sup>2</sup>; Jia Li<sup>5</sup>; Caiqing Yan<sup>6</sup>; Mei Zheng<sup>6</sup>; Zhiyong Xie<sup>7</sup>; Gan Zhang<sup>2</sup>; Junyu Zheng<sup>3\*</sup>

<sup>1</sup>College of Environmental Science and Engineering, Tongji University, Shanghai 200092, P.R. China

<sup>2</sup>State Key Laboratory of Organic Geochemistry, Guangzhou Institute of Geochemistry, Chinese Academy of Sciences, Guangzhou, 510640, P.R. China

<sup>3</sup>Jinan University Institute for Environmental and Climate Research, Guangzhou, 511443, P.R. China

<sup>4</sup>Shanghai Key Laboratory of Atmospheric Particle Pollution and Prevention (LAP3), Department of Environmental Science and Engineering, Fudan University, Shanghai 200433, P.R. China

<sup>5</sup>School of Environmental Science and Engineering, Yangzhou University, Yangzhou 225127, P.R. China

<sup>6</sup>SKL-ESPC and BIC-EAST, College of Environmental Sciences and Engineering, Peking University, Beijing 100871, P.R. China

<sup>7</sup>Helmholtz-Zentrum Geesthacht, Centre for Materials and Coastal Research, Institute of Coastal Research, Geesthacht, 21502, Germany

\*Corresponding authors: Yingjun Chen (yjchenfd@fudan.edu.cn); Jun Li (junli@gig.ac.cn); Junyu Zheng ([zhengjunyu\\_work@hotmail.com](mailto:zhengjunyu_work@hotmail.com))

5

**Abstract:** The molecular compositions and structures of polar organic ~~matters~~ compounds (POCs~~M~~) in particles emitted from various vessels and excavators were characterized using Fourier Transform Ion Cyclotron Resonance Mass Spectrometry (FT-ICR MS). ~~POM-POCs was were~~ extracted ~~by with~~ purified water and ~~discussed~~ sorted by elemental composition ~~which was divided~~ into three groups, ~~namely:~~ CHO, CHON and S-containing compounds (CHONS and CHOS). The results showed that: (i) CHO (accounting for 49% of total ~~POM-POCs in terms of relative~~ peak response) was the most abundant group for all tested off-road engines, followed by CHON (33%) and CHOS (35%) for diesel- and HFO (heavy fuel oil)-fueled off-road ~~equipment~~ engines, respectively. (ii) The abundance and structure of the CHON group in water extracts were different in terms of engine type and load. The ~~fraction of~~ relative peak response of CHON was the highest for excavator emissions ~~under the in~~ working mode, compared to ~~other modes (the~~ idling and moving modes). Furthermore, dinitrophenol and methyl dinitrophenol were the most abundant emission species for high-rated speed excavators ~~with high-rated speed~~, while nitronaphthol and methyl nitronaphthol were more important for low-rated speed vessels. (iii) The composition and structure of the S-containing compounds ~~was were~~ directly influenced by fuel oil characteristics (sulfur

10

15

20

content and aromatic ring), with ~~much~~ more condensed aromatic rings in ~~the~~ S-containing compounds observed ~~for in~~ HFO-fueled vessels ~~emissions~~, while ~~more~~ abundant aliphatic chains were observed ~~in emissions from in~~ diesel equipment ~~emissions~~. Overall, higher fractions of condensed hydrocarbons and aromatic rings in POCSM emitted from vessels using HFO caused strong optical absorption capacity. ~~And~~ Different structures ~~existing~~ in POCSM could provide a direction ~~to for~~ qualitative and ~~quantities quantitative analysis of the exact~~ organic compounds as tracers to distinguish ~~the these~~ emissions from diesel or HFO-fueled off-road engines.

## 1. Introduction

~~A~~ Rapidly increased ~~in the~~ number of off-road engines (e.g. vessels and excavators) ~~have has~~ resulted in large quantities of pollutants emission, which have severe impacts on air quality, human health and climate change (Righi et al., 2011; Li et al., 2016; Liu et al., 2016; Wang et al., 2018; Zhang et al., 2018). ~~Only in China~~ ~~In China alone~~, the dead weight capacity of vessels increased from 51 million tons in 2000 to 266 million tons in 2016 (NBS 2017). It was reported that ~~emissions from~~ fishing boats ~~emission~~ accounted for 18.3% of total fine particulate matter (PM<sub>2.5</sub>) emitted by on-road vehicles (Deng et al., 2017). Almost 14, 500-37, 500 premature deaths per year were caused by ~~emissions from~~ ocean-going vessels ~~emission~~ in East Asia (Liu et al., 2016). As reported by ~~the~~ US EPA, nearly 34% of elemental carbon (EC) emissions originated from off-road diesel vehicle emissions in the United States (USEPA 2015). Furthermore, ~~constructive construction~~ equipment, ~~one of the~~ typical off-road diesel vehicles, emitted ~~abundance abundant~~ volatile organic matter (VOC). ~~which VOC~~ was

considered ~~as~~ one of the most important ~~procedures-precursor~~ of ~~dominant components~~ of Humic-Like Substances (HULIS), like organosulfates (Zhang et al., 2010; Tao et al., 2014).

~~The~~ Emission standards for ~~non~~off-road engines are ~~incomplete-not fully~~ implemented in China, especially for ~~the~~ vessel emissions. ~~Nowadays~~ Currently, stage 3 emission standard has been implemented for ~~non~~off-road diesel engines ~~from-since~~ from-since 2016, while stage 1 emission standard for emission from vessels ~~emission~~ will be implemented in 2020 (SEPA et al., 2015a, SEPA et al., 2016). Furthermore, the oil quality for ~~non~~off-road mobile sources ~~couldn't-cannot~~ be guaranteed. According to the standard of GB/T17411-2012, the sulfur content in oil ~~using-used~~ for vessels could reach ~~to~~ 1-3.5%, which was 200-700 times higher than those for China IV diesel (SEPA et al., 2015b). There is a continued need ~~for-to~~ apportion the contributions of off-road ~~equipment-engines~~ to atmospheric PM<sub>2.5</sub>. However, to the best of our knowledge, there is no unique tracer available to identify ~~and distinguish between~~ off-road engines ~~and~~ on-road combustion ~~engines~~ (Zhang et al., 2014; Liu et al., 2017). According to ~~the~~ published studies, Vanadium (V) was usually used to identify the contribution of PM<sub>2.5</sub> from ship emission. ~~But~~ However, it should be ~~noticed-noted~~ that V emissions can also be attributed to industrial activities ~~could also be emitted by industry activities~~. Therefore, overestimated/underestimated results of contributions from ship emissions to PM<sub>2.5</sub> in the atmosphere ~~could be gained by~~ are obtained while using V as the only tracer (Zhang et al., 2014). Furthermore, some isomer ratios of polycyclic aromatic hydrocarbons were recommended as indicators of off-road engines emissions, but the

huge variations of ~~those~~ these ratios in the atmosphere might ~~mislead~~ affect the ~~final~~ end results (Zhang et al., 2005; Cui et al., 2017). Thus, there is an ~~urgency~~ urgent need to explore ~~the~~ unique organic tracers.

Organic matter (OM) is one of the most important components in PM<sub>2.5</sub> emitted  
5 by ~~non~~ off-road ~~mobiles~~ vehicles, with the highest fraction accounting for up to  
approximately 70% in ship emissions (Cui et al., 2017). ~~Determining the characteristics~~  
~~of OM from different emission sources could help to reduce uncertainty in estimations~~  
~~of the relative contributions of different sources and improve our understanding of~~  
~~public health and climate effects.~~ However, ~~large portions~~ substantial portions of OM  
10 ~~emitted from off-road engine combustion~~, especially for ~~polar organic matter~~ POCs,  
were ~~hardly~~ difficult to isolate and identify by traditional analytical instruments, and  
~~were still~~ remain unknown. ~~Some traditional mass spectrometry is equipped with~~  
~~quadrupole, ion trap or time of flight, which has limited resolving power when~~  
~~comparing with the FT-ICR MS.~~ For instance, ~~large portions of unidentified organic~~  
15 ~~matters were detected by Gas chromatography coupled with mass spectrometry (GC-~~  
~~MS), and only less than 20% of total OM could be resolved (Rogge et al., 1993; Schauer~~  
~~et al., 1999).~~ It remains a challenge to quantify the high molecular weight and polar  
~~organic matter contents, which might have more significant effects on air quality,~~  
~~human health and climate change than those of resolved organic species (Feng et al.,~~  
20 ~~2013; Fan et al., 2016).~~ For example, HULIS was reported to arise primarily from  
biomass burning and fossil fuel (coal and diesel) combustion. There is substantial  
literature that deals with the optical characterization and molecular composition of

HULIS emitted from biomass burning, an important source of BrC worldwide. However, the contribution of diesel combustion to BrC was also controversial (Zheng et al., 2013). A reason for these discrepant degrees of recognition between diverse sources was the similarity in chemical structure (nitrogen-containing bases and nitroaromatics) found between HULIS and the compounds emitted from biomass burning (Ren et al. 2018; Violaki and Mihalopoulos 2010). It may also be due to a lack of knowledge on characterization of POCs emitted from diesel vehicles, especially for off-road diesel vehicles.

FT-ICR MS ~~as one of the most~~ is an advanced techniques with a high mass resolution of 0.00001 ~~is and is always commonly~~ used to determine the organic matter composition at a molecular level in crude oil (Jiang et al., 2019). FT-ICR MS is usually coupled with ~~some~~ soft ionization techniques, such as electrospray (EST) and atmospheric pressure chemical ionization (APCI). They are used to analyze polar species and non-polar organic matters, respectively (Smith et al., 2009; Smit et al., 2015). It should be noted that FT-ICR MS, without chromatographic separation, can only detect molecular formulas and molecular identification based on elemental composition alone. This is challenging because most complex molecules have several stable isomeric forms (Laskin et al., 2009). However, some traditional mass spectrometry methods are equipped with quadrupole, ion trap, or time of flight, which have limited resolving power compared with the FT-ICR MS. Recently, some studies have successfully characterized the elemental components of polar organic matter compounds present in the atmosphere or emitted by different sources using FT-

ICR MS (Wozniak et al., 2008; Laskin et al., 2009; Smith et al. 2009; Yassine et al. 2014), ~~but~~ A few of them have been undertaken in China, especially for sources emission (Lin et al., 2012; Jiang et al., 2016; Mo et al., 2018; Song et al., 2018). Song et al. (2018) reported that the most ~~abundance~~ abundant group of HULIS emitted from biomass burning and coal combustion was CHO, followed by CHON for biomass burning and CHOS for coal combustion. In contrast, Wang et al. (2018) observed that CHON was the dominant compound emitted from straw residue burning. In addition, the possible chemical structure of HULIS could be determined by FT-ICR MS. Tao et al. (2014) compared the molecular compositions of organosulfates in aerosols sampled in Shanghai and Los Angeles. They found that the organosulfates in Shanghai had a low degree of oxidation and unsaturation, indicating the presence of long aliphatic carbon chains. Smith et al. (2009) reported that organic aerosol emitted from biomass burning showed a clear trend of increasing saturation with increasing molecular weight and exhibited a significant CH<sub>2</sub>-based homologous series.

This study aimed to detect chemical characterize polar organic aerosol constituents at the molecular level that are emitted from typical off-road engines by FT-ICR MS to provide new aerosol marker compounds for off-road engines.~~This study aimed to detect the molecular characterization of polar organic matter emitted from typical nonoff road engines by FT-ICR MS to provide a new direction to find biomarkers for nonoff road engines.~~ To this end, studies were conducted: 1) to identify the molecular composition of ~~polar organic matter~~ POCs from excavators under three different operation modes; 2) to determine the molecular composition and possible structure of ~~polar organic~~

~~matter~~POCs from vessels using HFO and diesel, respectively; 3) to explore the key factors affecting the composition and structure of ~~polar organic matter~~POCs from HFO and diesel fueled off-road engines; 4) to ~~provide the direction to find the possible~~pave the way for the discovery of potential tracers for off-road engines' emissions.

## 2. Materials and Methods

### 2.1 Sample collection

Four ships using HFO and diesel, ~~and as well as~~ four excavators covering different emission standards and powers were chosen as ~~being~~, representative ~~of~~ off-road vehicles in China. Detailed information about the four ships and four excavators is ~~shown presented~~ in **Table 1**. Before conducting ~~the~~ field sampling, the original fuel was obtained directly from the fuel tank, and sent to the testing company ~~to~~ for quality evaluation ~~detect the fuel quality~~ (**Table 2**). For excavator emission sampling, three operation modes (idling, moving, and working) were selected ~~including the idling, moving and working modes~~, and sampling time was approximately half an hour for each mode. The flowrate of the PM<sub>2.5</sub> sampler was 10 L/min. Commercial equipment (MFD25, produced by Shanghai Besser ~~environmental~~ Environmental protection Protection technology ~~Technology~~ Co., Ltd.) was used for PM<sub>2.5</sub> sampling. The description of the particulate matter dilution and sampling system are presented ~~in full~~ in Xia's published study (Xia, 2017). In short, the exhaust ~~flume~~ plume was pumped into a retention chamber and PM<sub>2.5</sub> was intercepted by the four PM<sub>2.5</sub> samplers. One Teflon and three quartz filters ( $\Phi$  ~~=~~ 47 mm) were finally acquired and one of the quartz filters was used to determine the chemical composition of PM<sub>2.5</sub> for each excavator

设置了格式: 下标



under the three operation modes. For vessels emissions, an on-board measurement system was used, as previously described (Cui et al., 2017; Deng et al., 2017). The on-board measurement system contains one dilution tunnel connected to two particulate samplers. Finally, particulate matter was collected on two quartz filters ( $\Phi=90$  mm) for each vessel.

**Table 1 Technical parameters of test off-road engines**

| Vehicle ID | Engine power (kW) | Type         | Length × width (m) | Material | Age (years) | Rated speed (rpm) | Fuel type |
|------------|-------------------|--------------|--------------------|----------|-------------|-------------------|-----------|
| YK         | 4440              | vessel       | 116×18             | Metal    | 11          | 173               | HFO       |
| YF         | 5820              | Cargo vessel | 139×20.8           | Metal    | 16          | 141               | HFO       |
| GB1        | 91                | Gillnet      | 20×4.3             | Wooden   | 10          | 1500              | Diesel    |
| TB4        | 235               | Trawler      | 24×5.2             | Wooden   | 7           | 1310              | Diesel    |
| CAT320     | 106               | Excavator    | 9.5×3.2            | Metal    | >11         | 1650              | Diesel    |
| CAT330B    | 165.5             | Excavator    | 11.1×3.3           | Metal    | >11         | 1800              | Diesel    |
| CAT307     | 85                | Excavator    | 6.1×2.3            | Metal    | 9           | 2200              | Diesel    |
| PC60       | 40                | Excavator    | 6.1×2.2            | Metal    | 9           | 2100              | Diesel    |

**Table 2 Results of the fuel quality analysis**

| Engine ID | Carbon (C) % | Hydrogen (H) % | Oxygen (O) % | Nitrogen (N) % | Sulfur (S) % | Vanadium (V) mg/kg | Water Content MJ/kg | Kinematical viscosity (40°C) mm <sup>2</sup> /s |
|-----------|--------------|----------------|--------------|----------------|--------------|--------------------|---------------------|-------------------------------------------------|
| YK        | 84.12        | 10.38          | 4.26         | 0.79           | 0.448        | 5                  | 0.21                | 123.2                                           |
| YF        | 80.54        | 10.05          | 8.23         | 0.78           | 2.46         | 19                 | 8.98                | 410.2                                           |
| GB1       | 85.96        | 12.76          | <0.3         | 0.49           | 0.022        | /                  | /                   | 4.517                                           |
| TB4       | 86.21        | 12.47          | 0.45         | 0.49           | 0.323        | /                  | /                   | 4.976                                           |
| CAT320    | 86.38        | 11.5           | 2.00         | 0.05           | 0.019        | <1                 | Trace               | 5.592                                           |
| CAT330B   | 86.38        | 11.5           | 2.00         | 0.05           | 0.019        | <1                 | Trace               | 5.592                                           |
| CAT307    | 86.32        | 11.2           | 1.99         | 0.05           | 0.138        | <1                 | Trace               | 5.420                                           |
| PC60      | 85.88        | 12.1           | 1.85         | 0.04           | 0.034        | <1                 | Trace               | 4.782                                           |

## 2.2 Chemical analysis

~~In this research, five combined samples for excavator under idling, working and moving and vessels using diesel and HFO were selected, respectively, from four~~

excavators (CAT320, CAT330B, CAT307 and PC60) under three modes, two diesel vessels (DB1 and DB2) and two HFO-fueled vessels (YK and YF) (Table S1). Then, different types of samples were subsequently extracted by water and 90%DCM+10%MeOH (DCM/MeOH), respectively and divided into 10 extraction samples. The extraction process was described as follows:—

Due to the limitations of organic matter load in filters and cost-prohibitive analysis, the filters sampled from off-road engines with the same operation modes or fuel quality were combined together to characterize the comprehensive molecular compositions of POCs for off-road engines under different operation modes and fuel quality. As shown in Table S1, five samples (1, 2, 3, 4 and 5) were selected to conduct FT-ICR MS analysis, which represented vessels using heavy fuel oil, vessels using diesel, excavators under idling, moving, and working modes, respectively. Sample 1 was combined with 25% of the filter area from the two HFO-fueled vessels, namely YK and YF; Sample 2 was combined with 25% of filter area from two diesel-fueled vessels, namely GB1 and TB4; samples 3, 4, and 5 were combined with 50% of the filter areas from four excavators under idling, moving, and working modes, respectively, namely CAT320, CAT330B, CAT307 and PC60. The portions of filters (Table S1) were cut and combined for 40 minutes-min, subjected to ultrasonic extraction with 40 mL ultrapure water, and then filtered using a 0.22 µm PTFE membrane (Jinteng, China). The extraction solvent was then divided into three portions. Two portions were used for measuring the concentrations of organic carbon and optical absorbance, as described in the Supporting Information part A and B. The third portion was processed continually to assess the

chemical composition of PO~~CsM~~ by FT-ICR MS. The remaining extraction filters were frozen and then dried to remove ultrapure water. The filters were then subjected to 40 min of ultrasonic extraction with 36 mL dichloromethane and 4 mL methanol. The extracted solvent was divided into three portions, and ~~then these~~ were processed in the same way as previously described for the ultrapure water extract.

Both samples extracted with water or organic solvents were processed by a solid phase extraction (SPE) method to remove ions, which disturbed the results of FT-ICR MS. A majority of inorganic ions (e.g. ammonium, sulfate, and nitrate) and low-molecular-weight organic compounds such as isoprene-derived organosulfates and sugars could be removed during SPE treatment (Gao et al. 2006, Lin et al. 2012, Surratt et al. 2007), which were not discussed in this research. The details of the solid phase extraction method ~~was were~~ presented ~~in by~~ Mo et al. (2018). Briefly, the pH value of water extracts was adjusted to 2.0 ~~by using~~ HCl, and then passed through an SPE cartridge (Oasis HLB, 30  $\mu$ m, 60 mg/cartridge, Waters, USA). The adsorbed PO~~CsM~~ ~~was were~~ eluted with 6 mL 2% (v/v) ammonia/methanol and dried ~~by under~~ a gentle stream of N<sub>2</sub>. Finally, the PO~~CsM~~ ~~was were~~ re-dissolved using 10 mL ultrapure water.

### 2.3 FT- ICR MS analysis

The molecular characterization of PO~~CsM~~ was undertaken using negative-ion ESI FT-ICR MS (Bruker Daltonics GmbH, Bremen, Germany) with a 9.4-T refrigerated actively shielded superconducting magnet. Extracted solutions were injected at flow rate of 180  $\mu$ L·h<sup>-1</sup> through an Apollo II electrospray source. Emitter voltage, capillary column introduction voltage, and capillary column end voltage for negative-ion

formation were 3.0 kV, 3.5 kV and -320 V, respectively. The scan range was m/z 100–900 with a resolution >450 000 at m/z = 319 with <0.4 ppm absolute mass error. During analysis, nitrogen-containing compounds were used as an internal calibration. Finally, the spectrum peaks with ratio of signal/noise higher than 10 were exported.

~~The formula C<sub>c</sub>H<sub>h</sub>O<sub>o</sub>N<sub>n</sub>S<sub>s</sub>~~ was used as a general formula, ~~since~~ Some some criteria should be conformed to assign the possible formula (Wang et al., 2017). Briefly, all of the mathematically possible formulas for each ion were calculated with a mass tolerance of ±2 ppm. The H-to-C, N-to-C, O-to-C, and S-to-C ratios were limited to 0.3–3.0, 0–0.5, 0–3.0, and 0–2.0, respectively, in the ESI<sup>−</sup> mode. Peak magnitude is not indicative of a compound's concentration in a sample due to inherent biases of SPE extractions and electrospray ionization efficiencies (Wozniak et al., 2008). Therefore, the relative responses of detected peaks are discussed here. Due to the common occurrence of contamination during ESI analysis (Smit et al., 2015), ~~the~~ the relative response of all peaks was calibrated by subtracting the response of peaks detected for blank filters. The double bond equivalents (DBE) and aromaticity equivalents (X<sub>c</sub>) were calculated as follows:

$$\text{DBE} = 1 + 1/2 (2c - h + n) \quad (1)$$

$$\text{X}_{\text{c}} = (3 * (\text{DBE} - o - s) - 2) / (\text{DBE} - o - s) \quad (2)$$

Where c, h, o, n, and s were the number of C<sub>←</sub> H<sub>←</sub> O<sub>←</sub> N<sub>←</sub> and S atoms in the corresponding formulas. It should be noted that the formula with DBE < 0 or X<sub>c</sub> < 0 has been excluded (Wang et al., 2017).

### 3. Results and Discussion

### 3.1 General characteristics of ~~POCs~~ ~~M~~ for off-road engines

In general, the range of detected peaks for excavators and vessels ~~were between~~ had ~~molecular weights~~ ~~molecular weight of~~ between 150-900 Da, but most of the intensive peaks occurred in the molecular weight range of 200-400 Da. ~~M~~ The mass spectra for excavators in different operational modes and vessels using different oils were ~~different~~ varied from each other. ~~There were~~ The number of peaks for POCs were 4734, 3097, 4731, 4554 and 2818, ~~peaks~~ in excavator emissions under the idling, working, and moving modes, and vessel emissions using HFO and diesel, respectively. The average molecular weight of excavator emissions under the working mode and vessels using HFO were the lowest ( $322.6 \pm 69.9$  Da and  $331.3 \pm 72.9$  Da respectively).

For excavators, CHO was the most abundant group of ~~POCs~~ ~~M~~ in all three operation modes, accounting for 41%, 46% and 48% of all the formulas in terms of relative peaks response for the idling, working, and moving modes, respectively. S-containing compounds (~~i.e.~~ CHOS and CHONS) were most abundant in the idling mode, while the ~~relative~~ peak response of the CHON group was highest under the working mode (**Fig. 1**). For vessels, CHO was the most abundant species group of ~~POCs~~ ~~M~~ for both, the vessels using diesel and the ones using HFO, accounting for 50%-60% of total peak intensity. However, CHOS accounted for almost 30% of total ion intensity for vessels using HFO, ~~and this was~~ higher than other off-road diesel engines. Furthermore, the chemical properties of ~~POCs~~ ~~M~~ for vessels using HFO showed a larger degree of oxidation and unsaturation than other samples (**Table S2**). These differences in the composition of ~~POCs~~ ~~M~~ might be attributable to variations in engine load, fuel supply,

and air supply in different operation modes, which ~~were~~ are discussed ~~below~~ later.

As discussed in supporting information (SI Part C), the chemical properties of extractions derived from water or DCM/MeOH were significantly different (**Fig. S1 and Fig. S2**). And through comparing the optical properties between water and DCM/MeOH extractions, it was found that the average mass absorption efficiency of water extracts was significantly higher than those for 90% DCM+10% MeOH extracts (**Fig. S3**). Thus, it was necessary to extract PM<sub>2.5</sub> by water to explore the emission characteristics of ~~polar organic matters~~ POCs from off-road engines.

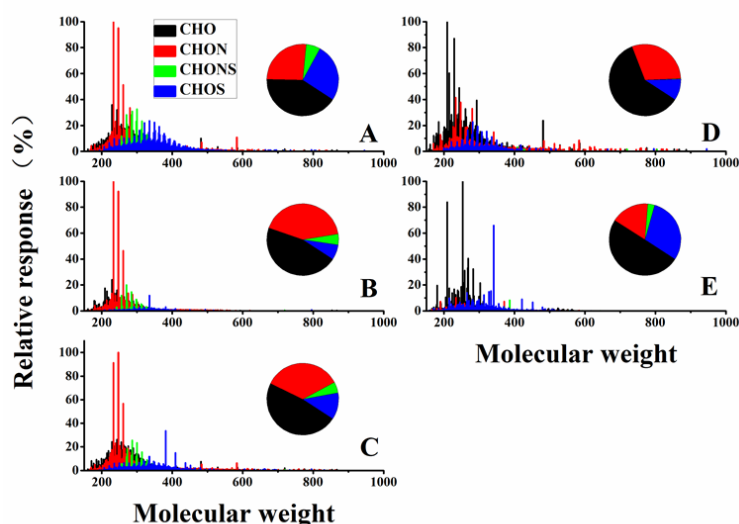

**Figure 1** Mass ~~spectrum~~ spectra of POCsM in water extractions for off-road diesel engines emissions. A, B, C, D and E were the mass spectra for excavators under idling, working, moving modes, and vessels using diesel and HFO, respectively

### 3.2 CHO compounds in POCs from off-road engines emission

The number of peaks for CHO compounds were 1746, 1287, ~~and~~ 1797, 1561, and

~~1318 spectra peaks~~ for excavators in the idling, working and moving modes, ~~and vessels respectively and 1561 and 1318 peaks for vessels~~ using HFO and diesel, ~~respectively, were identified by FT-ICR MS~~. Considering the number of detected peaks ~~for CHO compounds~~, the compositions of CHO group emitted from off-road engines were more complicated than those from ambient samples while ~~being~~ relatively comparable to those from other sources of emissions (e.g. biomass: ~~1514-2296; and~~ coal combustion: ~~918~~) (Lin et al., 2012; Jiang et al. 2016; Song et al. 2018). The average molecular weight of detected ions ~~for CHO compounds~~ for excavators in idling, working and moving and vessels using HFO and diesel ~~was were~~  $338 \pm 96.7$ ,  $316 \pm 84.6$ ,  $336 \pm 96.6$ ,  $331 \pm 72.9$  and  $357 \pm 123$  Da, respectively, which ~~was were~~ significantly higher than those emitted by coal and biomass burning ( $m/z=227-337$  Da) (Song et al., 2018). Excavators under ~~the~~ working mode had higher engine loads and combustion temperatures than those in other operation modes. Thus, the lowest number of CHO group ions and smallest average molecular weight were found during the working mode compared to the idling and moving modes, ~~which This indicated indicated~~ that long chain aliphatic hydrocarbons were liable to crack ~~during under high elevate~~ temperatures and ~~under~~ low air/fuel ratio conditions. This trend was consistent with ~~the results of~~ a previous study ~~results~~ (Wang et al., 2018) which found that low temperatures and oxygen-rich combustion would promote ~~the a~~ chain propagation reaction. Although the lipid contents of fossil fuel might be an important precursor of CHO compounds from off-road engines, different fractions of heteroatom and isomers could lead to significantly different structures for the CHO group (Hellier et al., 2017).

The highest ~~intensities-intensity peaksef- for~~ CHO compounds for off-road diesel engines ~~was-were~~ C<sub>9</sub>H<sub>5</sub>O<sub>6</sub> and C<sub>13</sub>H<sub>9</sub>O<sub>4</sub>, while for vessels using HFO, the highest peaks were ~~for~~ C<sub>10</sub>H<sub>5</sub>O<sub>8</sub>, C<sub>9</sub>H<sub>5</sub>O<sub>6</sub> and C<sub>10</sub>H<sub>5</sub>O<sub>9</sub>.

The ~~V~~an Krevelen (VK) diagram (H/C versus O/C) was ~~usually-generally~~ used to  
5 identify the structural properties of organic matter in FT-ICR MS research ~~due to as~~ only  
~~the~~ molecular formula was given (Wozniak et al., 2008; Lin et al., 2012). ~~Through-On~~  
comparing the ratios of H/C and O/C ~~for CHO compounds~~ for different off-road engines  
under three operational modes and using different fuel oils, we found that the CHO  
group for vessels using HFO had the highest degree of oxidation and unsaturation.

10 Furthermore, ~~the~~ CHO group ~~under-in~~ the working mode had a higher degree of  
oxidation and unsaturation than ~~under-in the~~ idling and moving modes. As shown in  
**Fig. 2**, region 1 ~~likely~~-represented monocarboxylic acid, which was more abundant in  
both idling and moving modes than ~~those~~ in the working mode ([Wozniak et al., 2008](#);

[Lin et al., 2012](#)). Region 2 represented compounds with low ratios of H/C and O/C and  
15 DBE>10 which were commonly considered as condensed hydrocarbons ([Wozniak et](#)

[al., 2008](#); [Lin et al., 2012](#)). Most compounds detected in the CHO group for vessels  
using HFO were molecular species in region 2 with a high number of O atoms and a  
low ratio of H/C. This was consistent with the original structure of combustion HFO,  
which was defined as bottom residue oil, containing fewer aliphatic hydrocarbons than  
20 those for diesel (Wikipedia 2018). Furthermore, low engine speeds for vessels ~~s~~ using  
HFO caused low temperature combustion which was prone to addition of O<sub>2</sub> to alkyl  
radicals and the subsequent formation of 6-member ring isomers (Sarathy et al., 2011;



Ranzi et al., 2015). The ratios of DBE/C can be used as an indicator for condensed aromatic ring structures (Hockaday et al., 2006; Lin et al. 2012; Yassine et al. 2014). When DBE/C was higher than 0.7, compounds were identified as soot-materials or oxidized polycyclic aromatic hydrocarbons (PAHs), ~~which was~~ an important class of light-absorption organic ~~matters~~ materials. The relative response of compounds with DBE/C>0.7 accounted for 3.2%, 6.5%, 3.1%, 26% and 8.3% of total ions for excavators under the idling, working and moving modes and vessels using HFO and diesel, respectively.

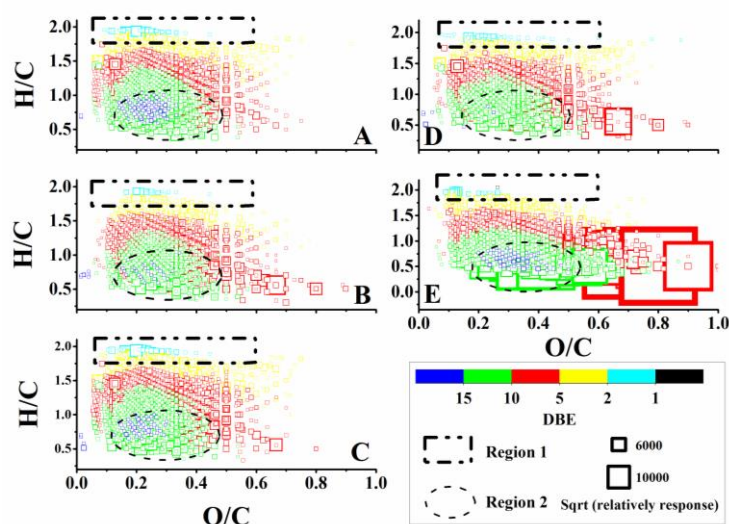

**Figure 2** The Van Krevelen (VK) diagrams of CHO compounds for off-road engines. (A, B, C, D and E were the mass spectra for excavators under idling, working, and moving modes and vessels using diesel and HFO, respectively)

### 3.3 CHON compounds in POCs from off-road engines emission

The ~~peaks intensity percentage relative response of for the~~ CHON group ~~to~~ ~~was~~ total ions was the second largest ~~for in~~ POCs emitted from off-road diesel engines,

except for ~~the fraction of CHON for~~ vessels using HFO (**Fig. 1**). The fraction of nitrogen oxide ~~was~~ declined with increasing length of the straight-chain alkyl (Hellier et al., 2017), which was consistent with the relative response of the CHON group for diesel and HFO fueled engines emissions. It was always considered that CHON mainly originated from biomass emission (18%-41%), while the percentage of peaks response for the CHON group to the total assigned ions measured from off-road diesel engines was comparable or slightly smaller than those emitted from biomass burning (Laskin et al., 2009; Wang et al., 2017; Song et al. 2018). As shown ~~from by~~ the average ratios of O/C and H/C for CHON group for vessels and excavators, the degree of oxidation and unsaturation of the CHON group for vessels ~~was were~~ higher than those for excavators (**Table S2**).

~~The relative response of~~  $C_{10}H_5O_5N_2$ ,  $C_{11}H_7O_5N_2$ , and  $C_{12}H_9O_5N_2$  were the most abundant peaks in terms of compounds relative responses for the CHON group detected in diesel fueled excavators and vessel emissions, while  $C_{10}H_4NO_6$ ,  $C_9H_4NO_4$ , and  $C_{10}H_4NO_7$  were highest for vessels using HFO. Diesel-fueled off-road equipment and vessels using HFO were high-rated speed and low-rated speed engines, respectively (**Table 1**). This might be the main reason for the formation of 2 nitrogen atoms in the CHON group for high-rated speed equipment, which results in higher combustion temperatures than those for low-rated speed engines, thereby promoting nitrogen atom attachment. The higher oxygen content in vessel emissions using HFO might be attributable to the higher oxygen content and kinematical viscosity of the HFO (**Table 2**). The large value of kinematical viscosity in HFO was ~~caused by a~~ result of the

设置了格式: 非上标/ 下标

设置了格式: 非上标/ 下标

presence of a certain ~~amount~~number of aromatic hydrocarbons, fatty acids etc. which were difficult to combust and resulted in incomplete combustion (Örs et al., 2018).

For further discussion of probable chemical structures, the CHON group was divided into 23 subgroups, including OxN1 ( $1 \leq x \leq 10$ ) and OyN2 ( $2 \leq y \leq 14$ ) (Fig. S4).

The distribution patterns of CHON subgroups for excavators under three operational modes were similar, with the highest relative response of N<sub>2</sub>O<sub>5</sub>, while NO<sub>4</sub>-NO<sub>5</sub> were the highest group for vessel emissions in terms of relative response. The ratio of O/N higher than 3 is always indicative of the presence of nitro compounds (-NO<sub>2</sub>) or some organic nitrates (with NO<sub>3</sub>). Yassine et al. (2014) reported that DBE/C was only valuable to the aromaticity properties ~~for these of~~ compounds with pure hydrocarbons.

The aromaticity equivalent (Xc) has been proposed to evaluate the aromaticity of organic material with heteroatoms (e.g. N, S). When the value of Xc exceeds 2.5, aromatic structures are present within the compounds, while a value of Xc higher than 2.7, indicates the presence of condensed aromatic compounds (e.g. benzene core structure with Xc=2.5; pyrene core structure with Xc=2.83; ovalene core structure with Xc=2.92). ~~Analyses of the chemical structures for different off road engines revealed that CHON structures were different in excavators and vessels regardless of the operation mode and fuel oil used. Thus, only excavators under the working mode and vessels using HFO will be further discussed.~~

~~As mentioned mentioned, in the previous, the formulas in the most abundance relative response of CHON group with the most abundant relative responses for diesel-~~

带格式的: 缩进: 首行缩进: 0 字符

fueled excavators and vessels were. As shown in Fig. 3,  $C_{10}H_5N_2O_5$ ,  $C_{11}H_7N_2O_5$ , and  $C_{12}H_9N_2O_5$ , which were composed of the biggest largest green ball in Figure. 3 with  $X_n=2.5$ , indicating the presence of a benzene core structure existing in the compounds. Thus, it was most likely was for excavators under three operational modes might be dinitrophenol, and methyl dinitrophenol compounds. Likewise,  $C_{10}H_4NO_6$ ,  $C_9H_4NO_4$  and  $C_{10}H_4NO_7$  For vessel emissions, comprise the largest yellow ball belong to the biggest yellow ball in Figure. 3 for HFO-fueled vessels, most of which have  $X_n>2.7$  indicating the presence of condensed aromatic compounds existing. Nitronaphthol, and methyl nitronaphthol were the most important significant compounds (e.g.  $C_{10}H_4NO_6$ ,  $C_9H_4NO_4$  and  $C_{10}H_4NO_7$ ) arising from HFO-fueled vessels vessel emissions, which have previously been reported from in vehicles emissions (Yassine et al., 2014; Tong et al., 2016). Furthermore, almost 55% of the CHON group had an O/N ratio higher than 5, and half of the CHON group had more aromatic rings higher than 3 for HFO-fueled vessels using HFO. This was significantly higher than those for excavators and vessels using diesel. The reactivity and life span of these compounds should be considered to determine whether these chemicals could be used as tracers for off-road engines combustion. The same chemical structure discovered in the atmosphere seemed as indicated that SOA could be provide valid evidence to prove that CHON with nitrophenol or nitronaphthol could exist in the atmosphere long enough for enough time to detectability be detected (Zhang et al., 2010).

设置了格式: 非上标/ 下标

设置了格式: 非上标/ 下标

设置了格式: 字体: 加粗

设置了格式: 字体: 加粗

设置了格式: 字体: (默认) Times New Roman

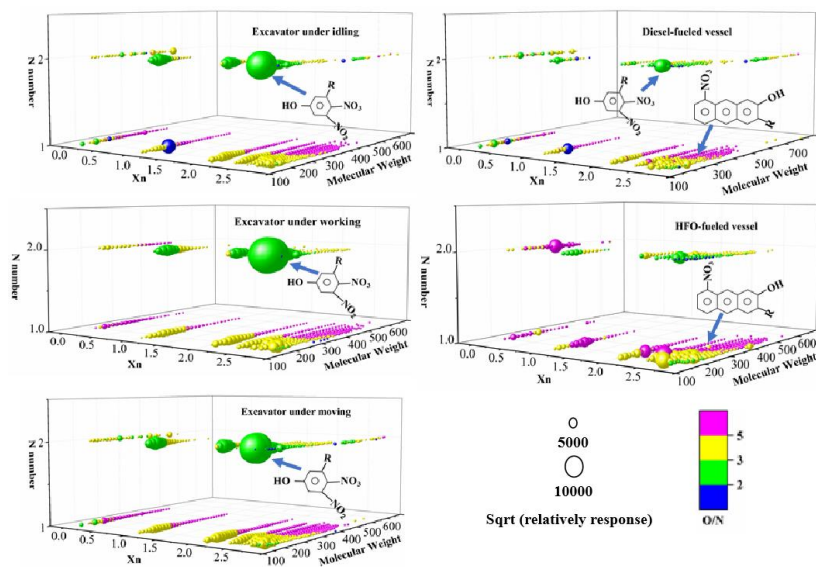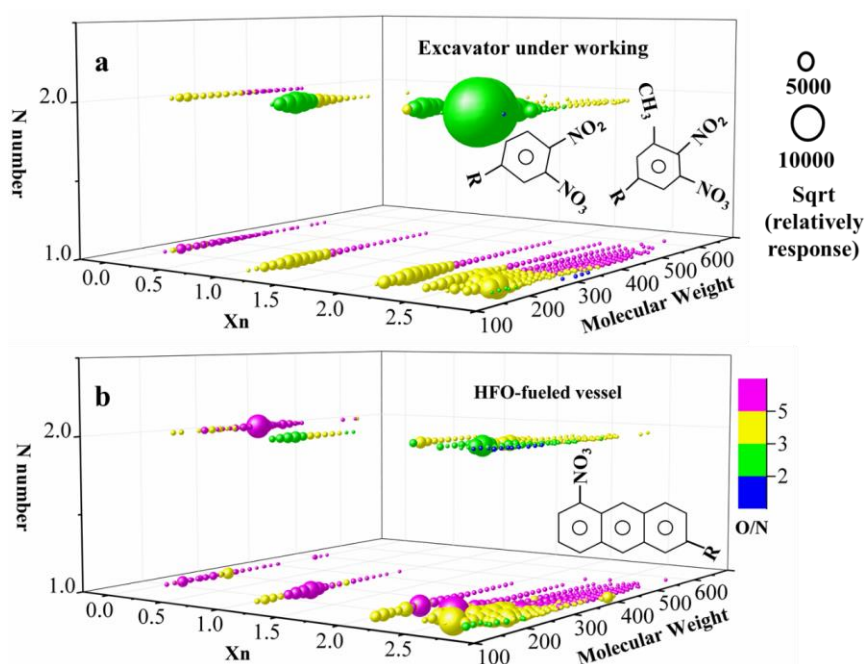

**Figure 3** Molecular composition and possible structure of CHON for excavators under [three](#) [working](#) modes [\(a\)](#) and vessels using HFO [and diesel](#) [\(b\)](#)

### 5 3.4 S-containing compounds

The last group of ~~POCs~~<sup>M</sup> was S-containing organic compounds, including CHOS and CHONS. As shown in **Fig. 1** and **Table S2**, the ~~percentage of relative-peaks~~ response ~~of for~~ S-containing species to total assigned peaks from vessels using HFO (35%) was higher than those from other vehicles, with 1, 3, 2 and 3 times more than those for excavators under idling, working, moving and vessels using diesel, respectively. However, the ~~relative response of the~~ CHONS group for excavators was significantly higher than those for vessel emissions in terms of relative ions intensity. The high fraction of peak responses for S-containing species ~~from~~ vessels using HFO ~~may-might~~ be attributed to the high sulfur content in HFO. The maximum sulfur content in HFO ~~reported-detected~~ in this study was 2.46%, which was significantly higher than those in diesel (**Table 2**). In addition, for excavators under the idling mode, the ~~sum~~ fraction of the relative response of S-containing compounds was 32.5%, while for the working and moving modes, ~~they was-were~~ 11.6% and 17.1%, respectively.

~~In order to~~<sup>To</sup> facilitate further discussion, three ~~types-of~~ subgroups for CHONS ( $N_1O_5S_1$ ,  $N_1O_6S_1$  and  $N_1O_7S_1$ ) and eight ~~types-of~~ subgroups for CHOS ( $O_3S_1$ ,  $O_4S_1$ ,  $O_5S_1$ ,  $O_6S_1$ ,  $O_6S_2$ ,  $O_7S_1$ ,  $O_7S_2$  and other) were characterized (**Fig. 4**). Generally,  $O_4S_1$  and  $O_5S_1$  were the most abundant subgroups for all ~~of the~~ off-road engines. For example,  $N_1O_5S_1$  was the most abundant subgroup for the working mode, accounting for 36.7% of S-containing compounds. When  $O/S \geq 4$ , this indicates that a sulfate group exists within the organic compounds. Thus,  $O_5S_1$  and  $O_4S_1$  may be organosulfates or sulfonates (Riva et al., 2015). Riva et al. (2015) found that sulfur-containing products from PAHs were possible, and might not be solely sulfates but also sulfonates,

especially with O/S values of 4-5. On comparing the sulfur-containing products observed in this study and the Riva et al. study, it was interesting to find that some PAH-derived OS products generated in the lab also have significant response in the field measurements. As shown as **Fig. S5**, three of the most abundant peaks ( $C_8H_7O_5S^-$ ,  $C_{11}H_5O_6S^-$  and  $C_{18}H_{29}O_4S^-$ ) of S-containing compounds emitted from HFO-fueled vessels were also observed in the lab from PAH oxidations in the presence of sulfate.

Although the fraction of S-containing compounds for vessels using HFO was similar ~~with~~to those for excavators under idling (**Fig. 1**), different structures of compounds existed between these two engines. The relative response of  $O_6S_2$  and  $O_7S_2$  for excavators under idling was considerably higher than those for vessels using HFO.

S-containing compounds for vessels were highly unsaturated with 8.03 for the average DBE value which was higher than those for excavators (6.77; **Table S2**). Furthermore, the fraction of compounds with  $X_c \geq 2.5$  accounted for 9.3%, 3.7%, 2.5%, 1.5% and 3.4% of the total S-containing compounds for vessels using HFO, diesel and excavators under idling, working and moving modes, respectively. Through a comparison of the average DBE value and fraction of compounds with  $X_c \geq 2.5$  between excavators and vessels, it was found that different structures were present in S-containing compounds. The most ~~of~~abundant S-containing compounds emitted from off-road diesel engines ~~were~~were aliphatic with long chains and sulfate fraction, which was consistent with the results ~~from~~of Tao et al. (2014) who found that most of the CHOS group contained long aliphatic carbon chains and low degrees of unsaturation and oxidation in ambient air in Shanghai. ~~and~~They suggested that most of these

设置了格式: 字体: 加粗

设置了格式: 下标

设置了格式: 下标

设置了格式: 下标

设置了格式: 上标

设置了格式: 下标

设置了格式: 下标

设置了格式: 下标

设置了格式: 上标

设置了格式: 下标

设置了格式: 下标

设置了格式: 下标

设置了格式: 上标

compounds were derived from diesel emission. It was interesting to find that the most abundant peaks of CHOS compounds observed in this study were also identified through the laboratory simulation study (Riva et al., 2016). The conclusions reported from Riva's study could provide a possible chemical reaction path to explain the chemical formula detected from off-road engine combustion. The formulas marked in bold red in Table S3 were the homologous compounds with  $C_{12}H_{23}O_5S^-$  which was reported to have been generated from dodecane oxidation by Riva et al.'s research, while the formulas in bold blue were likely formed from cycloalkanes. In contrast, the structures of S-containing compounds emitted from HFO fueled engines were liable to have condensed aromatic rings.

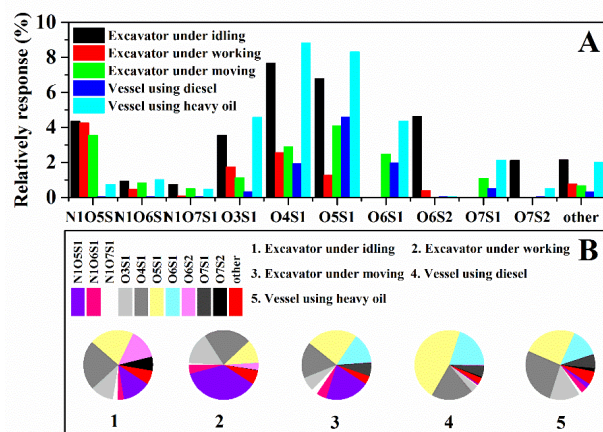

**Figure 4** The distribution of subgroups of S-containing compounds for off-road engines

On an average,  $88.5\% \pm 9.1\%$  and  $98.1\% \pm 0.22\%$  of CHOS compounds for vessels and excavators respectively were with  $O/S \geq 4$ , which indicated that organic sulfates or sulfonates were the most important impactful species S-containing compounds emitted from off-road engines. ~~Because f~~For most CHOS compounds



containing  $O/S \geq 4$ ,  $O^* = (O - 3)$  was used to identify the oxidation of organic compounds by removing the effect of sulfate or sulfonates. The modified VK diagram (H/C and  $O^*/C$ ) was used to characterize the structure of CHOS compounds (**Fig. 5**).

Some organosulfates or sulfonates with an aromatic ring (subgroup A) ~~were reported that~~ could be produced by SOA precursors (e.g.  $\alpha$ -pinene,  $\beta$ -pinene, monoterpenes) (Surratt et al., 2008). The most important precursors generating the subgroup A in this study might be the PAH-derived OS products in the presence of sulfate ~~the original primary compounds in combustion fuels, and not SOA precursors~~ (Riva et al., 2015).

However, there was another subgroup of organosulfates (subgroup B) emitted by diesel vehicles with long aliphatic carbon chains (Tao et al., 2014). Subgroup B of organosulfates was defined as  $C > 8$ ,  $DBE < 3$ , and  $3 < O < 7$  (red cycles in **Fig. 5**) (Tao et al., 2014), while the remaining CHOS compounds could be considered as subgroup A (blue cycle represented subgroup A with  $X_n \geq 2.5$  and the rest is contained within ~~be~~

the black circle). ~~Clearly, the~~ The fraction of subgroup B of CHOS compounds in off-road diesel engine emissions (average:  $33.9\% \pm 6.64\%$ ) were significantly higher than those in HFO fueled vessel emissions (19.9%). For vessels using HFO, almost 10% of CHOS compounds (blue ~~color~~ in **Fig. 5**) were organosulfates with one or more aromatic rings, which was consistent with the quality of the HFO. ~~Similar with the~~ The structures detected for CHON compounds for HFO-fueled vessels and the organosulfates with one or more aromatic rings were similarly ~~also~~ detectable in the atmosphere (Surratt et al., 2008).

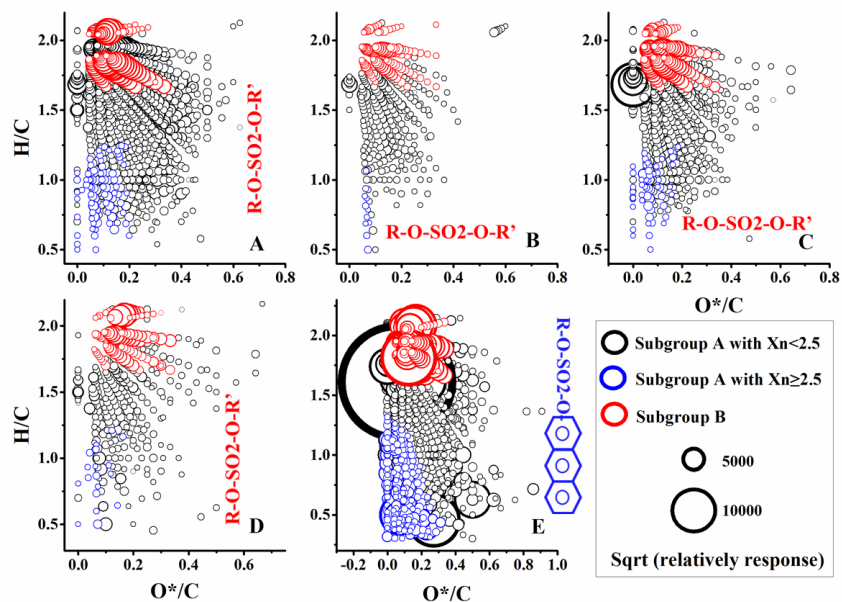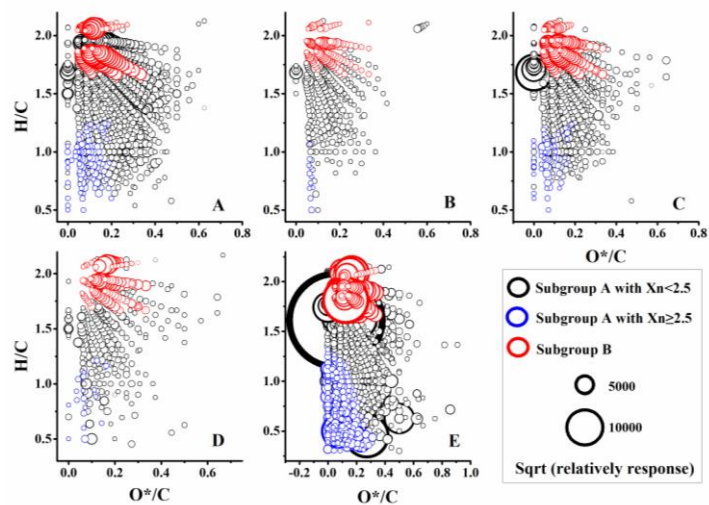

**Figure 5** The ratios of  $O^*/C$  vs  $H/C$  of CHOS and proportion of subgroup B and  $X_n > 2.5$  for off-road engines (A, B, C, D and E were the mass spectra for excavators under the idling, working,

5 [and moving modes](#) and vessels using diesel and HFO, respectively)

#### 4. Conclusions [and environmental implications](#)

CHO compounds were the most abundant species across all sources (biomass, coal, on-road vehicles and off-road vehicles) in terms of ions intensity, while the fractions of CHON and S-containing compounds were different from anthropogenic source emissions. Furthermore, the possible chemical structures of these compounds for diverse sources varied sharply.

For CHO compounds, the average DBE values from excavator and vessels emission were  $8.38 \pm 3.84$  and  $8.55 \pm 3.77$ , which was higher than those emitted from crop burning (6.9) and coal combustion (7.48) (Song et al., 2018). The methoxyphenols ( $C_9H_{14}O_4$ ,  $C_{18}H_{28}O_8$ ,  $C_{11}H_{20}O_5$ ,  $C_{18}H_{22}O_7$ ,  $C_9H_{12}O_4$ ) and fatty acids ( $C_{16}H_{32}O_2$ ), derived from limonene and palmitic acid, were frequently observed in crop burning emissions. CHO compounds with high C numbers ( $C_{20}H_{28}O_2$ ,  $C_{20}H_{26}O_2$ ,  $C_{20}H_{30}O_2$ ) were detected from wood burning. One benzene ring substituted with O-containing groups such as hydroxyl, methoxyl, and carboxyl ( $C_8H_6O_4$ ,  $C_{13}H_{18}O_4$  and  $C_{12}H_{16}O_4$ ) were dominant in coal combustion. Overall, mono-aromatics dominated tunnel samples (Tong et al., 2016) and off-road diesel vessels. However, abundant condensed aromatic ring structures with high O numbers ( $C_{10}H_5O_8$ ,  $C_9H_5O_6$  and  $C_{10}H_5O_9$ ) were found for HFO fueled vessels.

For CHON compounds, almost all sources were reported to emit nitrophenol compounds, while the substituted groups were slightly different due to different numbers of N and O atoms. The fraction of relative peak response of CHON compounds, an important light-absorbing substance, could reach half of the POCs from biomass burning emission. Methyl-nitrocatechols produced from the oxidation of cresol and N-bases composed of C, H, and N elements were considered as the biomarkers for biomass

设置了格式: 下标

burning (Laskin et al., 2009; Wang et al., 2017). However, om comparing the signal intensity of nitroaromatics in ambient aerosol and fresh biomass burning smoke, Wang et al. (2017) found evidence to the contrary. Signal intensity was stronger in ambient aerosols than that in fresh biomass burning smoke, which indicated the existence of other sources or aging process. Recently, nitrophenol was also detected in tunnel samples indicating traffic sources. In this study, we found that dinitrophenol were abundant in non-road diesel vehicle emissions, while nitronaphthol with one or more methyl groups was dominant for HFO-fueled vessels emission.

Except for biomass burning, S-containing compounds were still an important group of organic matter for coal combustion, on-road vehicles, off-road diesel vehicles, HFO-fueled vessels, and in background sites, accounting for 48%, 17%, 8.9%, 33% and 32%, respectively, of total detected organic matters. Organosulfates and sulfonates were one of the most important HULIS, which were reported as the prominent S-containing compounds at background sites due to aging reactions of organics with  $H_2SO_4$ . For coal combustion, S-containing compounds had low DBE and  $AI_{mod,w}$  values, which were probably considered as alkylbenzene rings substituted with one sulfate group. The specific structure of S-containing compounds was organosulfates or solfonates with condensed aromatic rings for HFO-fueled vessels, while more abundant organosulfates with aliphatic chains were observed in emissions from off-road diesel equipment. Likewise, the organosulfates with aliphatic long chains alkanes were observed in on-road traffic emissions due to its original oil structure (Jiang et al., 2016; Riva et al., 2016; Tao et al., 2014). These S-containing compounds with high aromaticity, or long

设置了格式: 下标

设置了格式: 下标

设置了格式: 下标

chain alkanes, were frequently formed from secondary photochemical reactions between oxidation products of volatile and intermediate volatility organic compounds and acidified sulfate particle (Riva et al., 2015; 2016). Therefore, a high-abundance of S-containing compounds in the atmosphere might from secondary photochemical reactions and also be emitted directly from the combustion of off-road engines. In this study, one of the advanced techniques, FT-ICR MS, was adopted to grasp the characterization of molecular composition of POM emitted from off road engine combustion. Firstly, general characterizations of POM extracted by pure water were discussed. It was found that POM emitted from HFO vessels had highest degree of unsaturation and oxidation. Next, the detail characterizations of POM were discussed into three subgroups. CHO (accounting for 49% of total POM relative peak response) was the most abundant group for all tested off road engines, followed by CHON (33%) and CHOS (35%) for diesel and HFO fueled off road equipment, respectively. CHO compounds emitted by vessels using HFO had the highest degree of oxidation and unsaturation than the others, which majority were considered as soot materials or oxidized PAHs. For excavators, dinitrophenol, and methyl dinitrophenol have the highest intensity to CHON compounds, while nitronaphthol, and methyl nitronaphthol were the most important compounds for vessels. The most of S-containing compounds emitted from off road diesel engines were along with long aliphatic carbon chains, but for HFO fueled vessels, abundance of organosulfates were along with one or more aromatic rings. Comprehensive understanding of the molecular characteristics of POM from off road engine emissions could provide further insight into the key chemical

~~factors causing different absorption properties between different sources of emissions and identify the possible tracers for off-road engines combustion.~~

**Author contribution.** MC and CL contributed equally to this work. MC wrote the manuscript in close cooperation with CL and got helpful direction by YC, JL (Jun Li) and JZ. FZ, JL (Jia Li) and YM were responsible for sampling and chemical analysis. BJ, CY and MZ were familiar with data process of FT-ICR MS and mass absorption efficiency. ZX and GZ provided key contributions to article structure and logic.

**Acknowledgements.** This study was supported by the Natural Scientific Foundations of China (Nos. 91744203 and 41773120), Guangdong Provincial Science and Technology Planning Project of China (No. 2017B050504002) and State Key Laboratory of Organic Geochemistry, Guangzhou Institute of Geochemistry (No. SKLOG-201732).

**Competing interests.** The authors declare that they have no conflict of interest.

## References:

- Cui, M., Chen, Y., Feng, Y., Li, C., Zheng, J., Tian, C., Yan, C. and Zheng, M.: Measurement of PM and its chemical composition in real-world emissions from non-road and on-road diesel vehicles, Atmos. Chem. Phys., 17 (11): 6779-6795, 2017.
- Deng, W., Hu, Q. H., Liu, T. Y., Wang, X. M., Zhang, Y. L., Song, W., Sun, Y. L., Bi, X. H., Yu, J. Z., Yang, W. G., Huang, X. Y., Zhang, Z., Huang, Z. H., He, Q. F., Mellouki, A. and George, C.: Primary particulate emissions and secondary organic aerosol (SOA) formation from idling diesel vehicle exhaust in China, Science of the Total Environment, 593: 462-469, 2017.
- Fan, X., Song, J. and Peng, P. a.: Temporal variations of the abundance and optical properties of water soluble Humic-Like Substances (HULIS) in PM<sub>2.5</sub> at Guangzhou, China, Atmospheric

Research, 172-173 (Supplement C): 8-15, 2016.

Feng, Y., Ramanathan, V. and Kotamarthi, V. R.: Brown carbon: a significant atmospheric absorber of solar radiation? *Atmospheric Chemistry and Physics*, 13 (17): 8607-8621, 2013.

Gao, S., Surratt, J. D., Knipping, E. M., Edgerton, E. S., Shahgholi, M., Seinfeld, J. H.: Characterization of polar organic components in fine aerosols in the southeastern United States: Identity, origin, and evolution, *Journal of Geophysical Research*, 111(D14), 2006

Hellier, P., Talibi, M., Eveleigh, A. and Ladommatos, N.: An overview of the effects of fuel molecular structure on the combustion and emissions characteristics of compression ignition engines, *Proceedings of the Institution of Mechanical Engineers, Part D: Journal of Automobile Engineering*, 232 (1): 90-105, 2017.

Hockaday, W. C., Grannas, A. M., Kim, S. and Hatcher, P. G.: Direct molecular evidence for the degradation and mobility of black carbon in soils from ultrahigh-resolution mass spectral analysis of dissolved organic matter from a fire-impacted forest soil, *Organic Geochemistry*, 37 (4): 501-510, 2006.

Jiang, B., Kuang, B. Y., Liang, Y. M., Zhang, J. Y., Huang, X. H. H., Xu, C. M., Yu, J. Z. and Shi, Q.: Molecular composition of urban organic aerosols on clear and hazy days in Beijing: a comparative study using FT-ICR MS, *Environmental Chemistry*, 13 (5): 888-901, 2016.

Jiang, B., Zhan, Z. W., Shi, Q., Liao, Y., Zou, Y. R., Tian, Y. and Peng, P.: Chemometric Unmixing of Petroleum Mixtures by Negative Ion ESI FT-ICR MS Analysis, *Anal Chem*, 91 (3): 2209-2215, 2019.

Laskin, A., Smith, J. S. and Laskin, J.: Molecular Characterization of Nitrogen-Containing Organic Compounds in Biomass Burning Aerosols Using High-Resolution Mass Spectrometry, *Environmental Science & Technology*, 43 (10): 3764-3771, 2009.

Li, C., Yuan, Z., Ou, J., Fan, X., Ye, S., Xiao, T., Shi, Y., Huang, Z., Ng, S. K. W., Zhong, Z. and Zheng, J.: An AIS-based high-resolution ship emission inventory and its uncertainty in Pearl River Delta region, China, *Sci Total Environ*, 573: 1-10, 2016.

Lin, P., Rincon, A. G., Kalberer, M. and Yu, J. Z.: Elemental Composition of HULIS in the Pearl River Delta Region, China: Results Inferred from Positive and Negative Electrospray High Resolution Mass Spectrometric Data, *Environmental Science & Technology*, 46 (14): 7454-7462,

2012.

Lin, P., Yu, J. Z., Engling, G. and Kalberer, M.: Organosulfates in Humic-like Substance Fraction Isolated from Aerosols at Seven Locations in East Asia: A Study by Ultra-High-Resolution Mass Spectrometry, *Environmental Science & Technology*, 46 (24): 13118-13127, 2012.

5 Liu, D., Lin, T., Syed, J. H., Cheng, Z., Xu, Y., Li, K., Zhang, G. and Li, J.: Concentration, source identification, and exposure risk assessment of PM<sub>2.5</sub>-bound parent PAHs and nitro-PAHs in atmosphere from typical Chinese cities, *Scientific Reports*, 7 (1): 10398, 2017.

Liu, H., Fu, M., Jin, X., Shang, Y., Shindell, D., Faluvegi, G., Shindell, C. and He, K.: Health and climate impacts of ocean-going vessels in East Asia, *Nature Climate Change*, 6 (11): 1037-1041,  
10 2016.

Mo, Y., Li, J., Jiang, B., Su, T., Geng, X., Liu, J., Jiang, H., Shen, C., Ding, P., Zhong, G., Cheng, Z., Liao, Y., Tian, C., Chen, Y. and Zhang, G.: Sources, compositions, and optical properties of humic-like substances in Beijing during the 2014 APEC summit: Results from dual carbon isotope and Fourier-transform ion cyclotron resonance mass spectrometry analyses,  
15 *Environmental Pollution*, 239: 322-331, 2018.

NBS (National bureau of statistics, China) (2017). *China Statistical Yearbook*. Beijing, China Statistics Press.

Örs, I., Sarıkoç, S., Atabani, A. E., Ünalın, S. and Akansu, S. O.: The effects on performance, combustion and emission characteristics of DICI engine fuelled with TiO<sub>2</sub> nanoparticles addition  
20 in diesel/biodiesel/n-butanol blends, *Fuel*, 234: 177-188, 2018.

Ranzi, E., Cavallotti, C., Cuoci, A., Frassoldati, A., Pelucchi, M. and Faravelli, T.: New reaction classes in the kinetic modeling of low temperature oxidation of n-alkanes, *Combustion and Flame*, 162 (5): 1679-1691, 2015.

[Ren, L., Bai, H., Yu, X., Wu, F., Yue, S., Ren, H., Li, L., Lai, S., Sun, Y., Wang, Z., Fu, P.: Molecular composition and seasonal variation of amino acids in urban aerosols from Beijing, China. \*Atmospheric Research\*, 203: 28-35, 2018.](#)  
25

Righi, M., Klinger, C., Eyring, V., Hendricks, J., Lauer, A. and Petzold, A.: Climate impact of biofuels in shipping: global model studies of the aerosol indirect effect, *Environ Sci Technol*, 45 (8): 3519-3525, 2011.



Riva, M., Tomaz, S., Cui, T., Lin, Y. H., Perraudin, E., Gold, A., Stone, E. A., Villenave, E., Surratt, J. D.: Evidence for an unrecognized secondary anthropogenic source of organosulfates and sulfonates: gas-phase oxidation of polycyclic aromatic hydrocarbons in the presence of sulfate aerosol, *Environ Sci Technol*, 49(11): 6654-6664, 2015.

5 Riva, M., Da Silva Barbosa, T., Lin, Y. H., Stone, E. A., Gold, A., Surratt, J. D.: Characterization of Organosulfates in Secondary Organic Aerosol Derived from the Photooxidation of Long-Chain Alkanes. *Atmospheric Chemistry and Physics*:1-39, 2016.

Rogge, W. F., Hildemann, L. M., Mazurek, M. A., Cass, G. R. and Simoneit, B. R. T.: Sources of fine organic aerosol. 2. Noneatalyst and catalyst-equipped automobiles and heavy-duty diesel trucks, *Environmental Science & Technology*, 27 (4): 636-651, 1993.

10 Sarathy, S. M., Westbrook, C. K., Mehl, M., Pitz, W. J., Togbe, C., Dagaut, P., Wang, H., Oehlschlaeger, M. A., Niemann, U., Seshadri, K., Veloo, P. S., Ji, C., Egolfopoulos, F. N. and Lu, T.: Comprehensive chemical kinetic modeling of the oxidation of 2-methylalkanes from C<sub>7</sub> to C<sub>20</sub>, *Combustion and Flame*, 158 (12): 2338-2357, 2011.

15 Schauer, J. J., Kleeman, M. J., Cass, G. R. and Simoneit, B. R. T.: Measurement of emissions from air pollution sources. 2. C<sub>1</sub> through C<sub>30</sub> organic compounds from medium duty diesel trucks, *Environmental Science & Technology*, 33 (10): 1578-1587, 1999.

SEPA (State Environmental Protection Administration) and SAQSIQ (State Administration for Quality Supervision and Inspection and Quarantine) (2015a). General diesel fuels. Beijing.

20 SEPA (State Environmental Protection Administration) and SAQSIQ (State Administration for Quality Supervision and Inspection and Quarantine) (2015b). Limits and measurements methods for exhaust pollutants from vessels engine (I, II).

SEPA (State Environmental Protection Administration) and SAQSIQ (State Administration for Quality Supervision and Inspection and Quarantine) (2016). Limits and measurements methods for exhaust pollutants from diesel engines of non-road mobile machinery (III).

25 Smit, E., Rüger, C. P., Sklorz, M., De Goede, S., Zimmermann, R. and Rohwer, E. R.: Investigating the Trace Polar Species Present in Diesel Using High-Resolution Mass Spectrometry and Selective Ionization Techniques, *Energy & Fuels*, 29 (9): 5554-5562, 2015.

Smith, J. S., Laskin, A. and Laskin, J.: Molecular Characterization of Biomass Burning Aerosols

设置了格式: 字体: 五号

Using High-Resolution Mass Spectrometry, *Analytical Chemistry*, 81 (4): 1512-1521, 2009.

Song, J., Li, M., Jiang, B., Wei, S., Fan, X. and Peng, P. a.: Molecular Characterization of Water-Soluble Humic like Substances in Smoke Particles Emitted from Combustion of Biomass Materials and Coal Using Ultrahigh-Resolution Electrospray Ionization Fourier Transform Ion Cyclotron Resonance Mass Spectrometry, *Environmental Science & Technology*, 52 (5): 2575-2585, 2018.

[Surratt, J. D., Lewandowski, M., Offenberg, J. H., Jaoui, M., Kleindienst, T. E., Edney, E. O., Seinfeld, J. H., Effect of Acidity on Secondary Organic Aerosol Formation from Isoprene, \*Environ. Sci. Technol.\*, 41: 5363-5369, 2007.](#)

Surratt, J. D., Gómez-González, Y., Chan, A. W. H., Vermeylen, R., Shahgholi, M., Kleindienst, T. E., Edney, E. O., Offenberg, J. H., Lewandowski, M., Jaoui, M., Maenhaut, W., Claeys, M., Flagan, R. C. and Seinfeld, J. H.: Organosulfate Formation in Biogenic Secondary Organic Aerosol, *The Journal of Physical Chemistry A*, 112 (36): 8345-8378, 2008.

Tao, S., Lu, X., Levac, N., Bateman, A. P., Nguyen, T. B., Bones, D. L., Nizkorodov, S. A., Laskin, J., Laskin, A. and Yang, X.: Molecular Characterization of Organosulfates in Organic Aerosols from Shanghai and Los Angeles Urban Areas by Nanospray-Desorption Electrospray Ionization High-Resolution Mass Spectrometry, *Environmental Science & Technology*, 48 (18): 10993-11001, 2014.

Tong, H. J., Kourtev, I., Pant, P., Keyte, I. J., O'Connor, I. P., Wenger, J. C., Pope, F. D., Harrison, R. M. and Kalberer, M.: Molecular composition of organic aerosols at urban background and road tunnel sites using ultra-high resolution mass spectrometry, *Faraday Discussions*, 189: 51-68, 2016.

USEPA (2015). Evaluation of Black Carbon Emission Reductions from Mining Trucks in Russia: The Case of the Murmansk Region. USA.

[Violaki, K. and Mihalopoulos, N.: Water-soluble organic nitrogen \(WSON\) in size-segregated atmospheric particles over the Eastern Mediterranean. \*Atmospheric Environment\*, 44\(35\): 4339-4345, 2010.](#)

Wang, T. F., Yang, W. P., Wang, J. X., Kalitaani, S. and Deng, Z. Y.: Low temperature oxidation of crude oil: Reaction progress and catalytic mechanism of metallic salts, *Fuel*, 225: 336-342, 2018.

Wang, Y., Hu, M., Lin, P., Guo, Q., Wu, Z., Li, M., Zeng, L., Song, Y., Zeng, L., Wu, Y., Guo, S.,

Huang, X. and He, L.: Molecular Characterization of Nitrogen-Containing Organic Compounds in Humic-like Substances Emitted from Straw Residue Burning, *Environmental Science & Technology*, 51 (11): 5951-5961, 2017.

Wikipedia. (2018). Heavy oil. Retrieved [https://en.wikipedia.org/wiki/Heavy\\_oil](https://en.wikipedia.org/wiki/Heavy_oil), 2018.

- 5 Wozniak, A. S., Bauer, J. E., Sleighter, R. L., Dickhut, R. M. and Hatcher, P. G.: Technical Note: Molecular characterization of aerosol-derived water-soluble organic carbon using ultrahigh resolution electrospray ionization Fourier transform ion cyclotron resonance mass spectrometry, *Atmospheric Chemistry and Physics*, 8 (17): 5099-5111, 2008.

- 10 Yassine, M. M., Harir, M., Dabek-Zlotorzynska, E. and Schmitt-Kopplin, P.: Structural characterization of organic aerosol using Fourier transform ion cyclotron resonance mass spectrometry: Aromaticity equivalent approach, *Rapid Communications in Mass Spectrometry*, 28 (22): 2445-2454, 2014.

Xia Zequn (2017). Study on Characteristics of gaseous and particulate emission from non-road diesel vehicles on real world conditions. Master, South China University of Technology.

- 15 Zhang, F., Chen, Y., Chen, Q., Feng, Y., Shang, Y., Yang, X., Gao, H., Tian, C., Li, J., Zhang, G., Matthias, V. and Xie, Z.: Real-World Emission Factors of Gaseous and Particulate Pollutants from Marine Fishing Boats and Their Total Emissions in China, *Environ Sci Technol*, 52 (8): 4910-4919, 2018.

- 20 Zhang, F., Chen, Y., Tian, C., Wang, X., Huang, G., Fang, Y. and Zong, Z.: Identification and quantification of shipping emissions in Bohai Rim, China, *Science of The Total Environment*, 497-498 (0): 570-577, 2014.

Zhang, L., Zheng, J., Yin, S., Peng, K. and Zhong, L.: Development of non-road mobile source emission inventory for the Pearl River Delta Region, *Environmental science* (04): 886-891, 2010.

- 25 Zhang, X. L., Tao, S., Liu, W. X., Yang, Y., Zuo, Q. and Liu, S. Z.: Source Diagnostics of Polycyclic Aromatic Hydrocarbons Based on Species Ratios: A Multimedia Approach, *Environmental Science & Technology*, 39 (23): 9109-9114, 2005.

Zhang, Y. Y., Müller, L., Winterhalter, R., Moortgat, G. K., Hoffmann, T. and Pöschl, U.: Seasonal cycle and temperature dependence of pinene oxidation products, dicarboxylic acids and nitrophenols in fine and coarse air particulate matter, *Atmospheric Chemistry and Physics*, 10

(16): 7859-7873, 2010.

Zheng, G., He, K., Duan, F., Cheng, Y., Ma, Y.: Measurement of humic-like substances in aerosols:  
A review. Environmental Pollution, 181: 301-314, 2013.

设置了格式: 字体: (默认) Times New Roman, 五号

带格式的: 缩进: 左侧: 0 厘米, 悬挂缩进: 1 字符, 首行缩进: -1 字符, 行距: 1.5 倍行距
